# Supplementary material for: Cosolvent-free synthesis and characterisation of poly(phenyl-co-n-alkylsilsesquioxane) and poly(phenyl-co-vinylsilsesquioxane) glasses with low melting temperatures
Source: Royal Society of Chemistry journal article supplement (doi:10.1039/c9dt04579a), 2020-01-01
Supplement: c9dt04579a1.pdf [file c9dt04579a1.pdf]

Electronic Supplementary Information for:

**Cosolvent-free synthesis and characterisation of poly(phenyl-*co-n*-alkylsilsesquioxane) and poly(phenyl-*co*-vinylsilsesquioxane) glasses with low melting temperatures**

Ryosuke Seto,<sup>a</sup> Kiyoshi Kanamura,<sup>a</sup> Satoshi Yoshida<sup>b</sup> and Koichi Kajihara<sup>a\*</sup>

<sup>a</sup>Department of Applied Chemistry for Environment, Graduate School of Urban Environmental Sciences, Tokyo Metropolitan University, 1-1 Minami-Osawa, Hachioji, Tokyo 192-0397, Japan.

\*E-mail: [kkaji@tmu.ac.jp](mailto:kkaji@tmu.ac.jp)

<sup>b</sup>Department of Materials Science, School of Engineering, The University of Shiga Prefecture, 2500 Hassaka-cho, Hikone, Shiga 522-8533, Japan

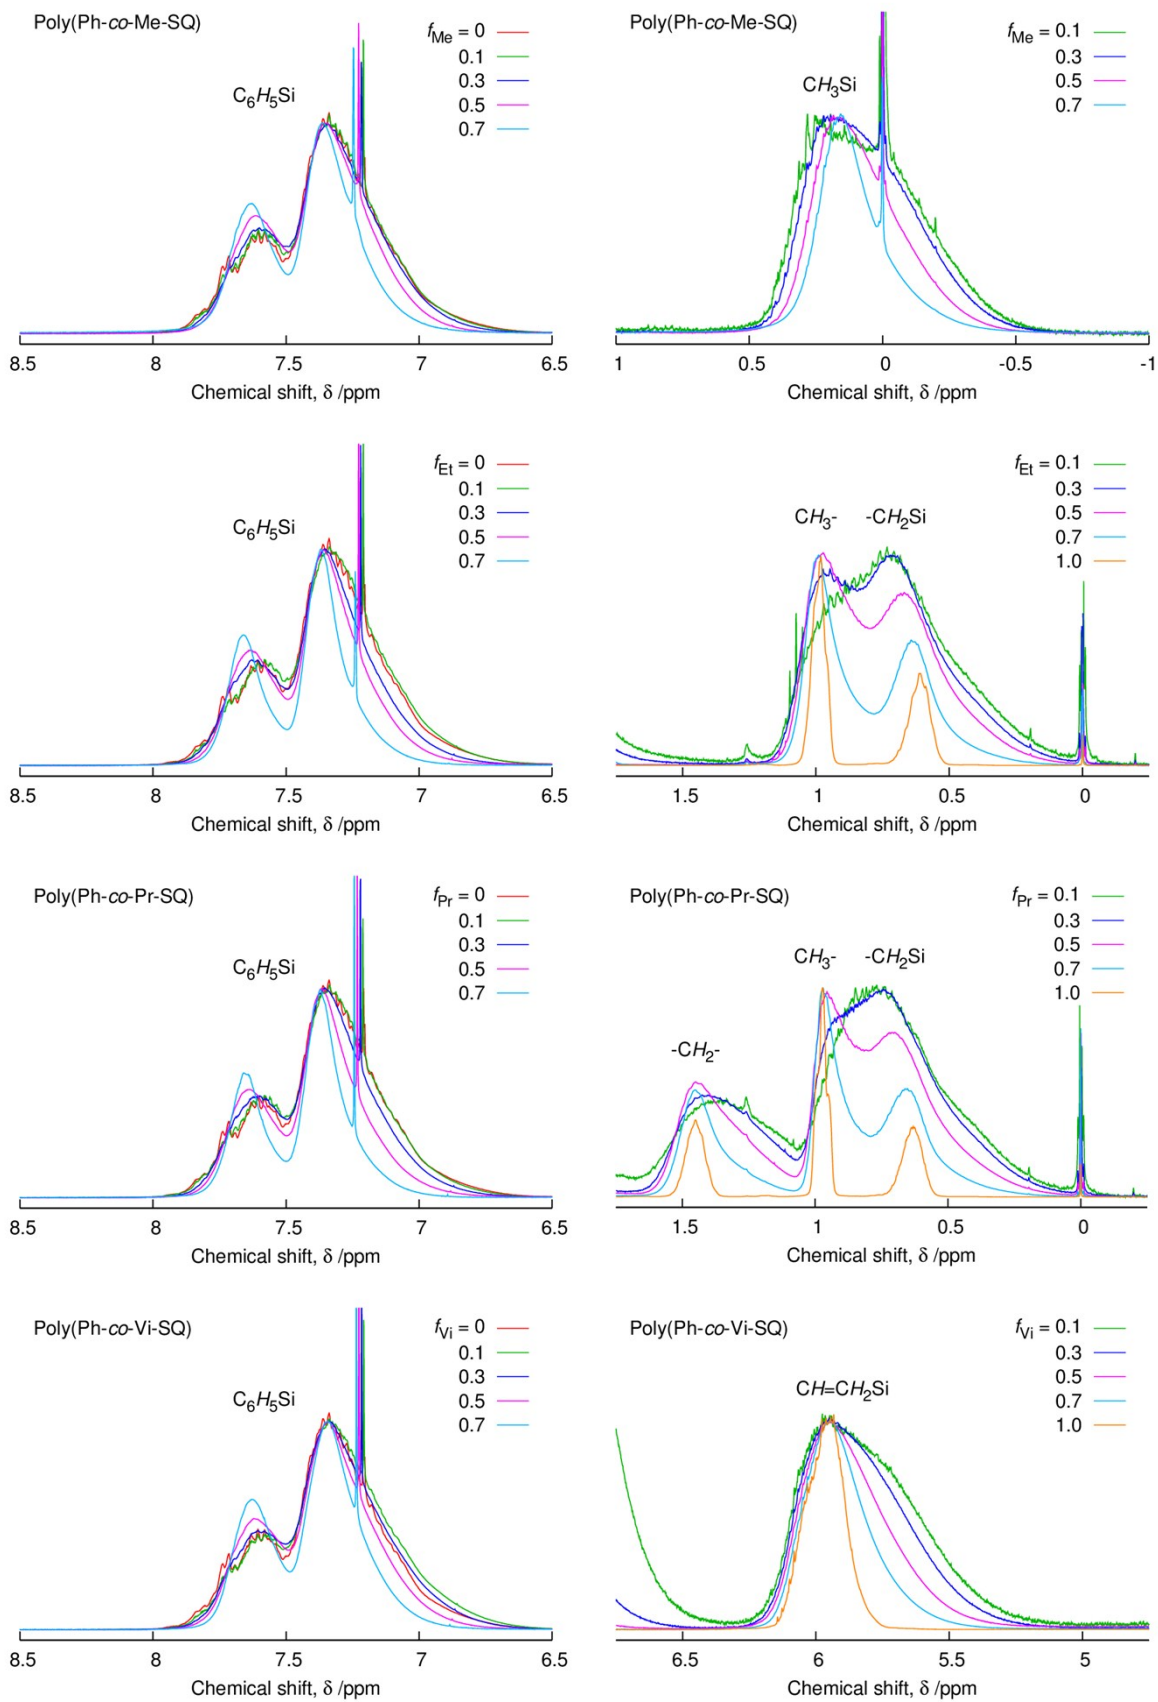

**Fig. S1** Magnified liquid-state  $^1\text{H}$  single-pulse NMR spectra of poly(Ph-co-R-SQ) with R = Me, Et, Pr, and Vi (300 MHz,  $\text{CDCl}_3$ ) normalized to the maximum value.

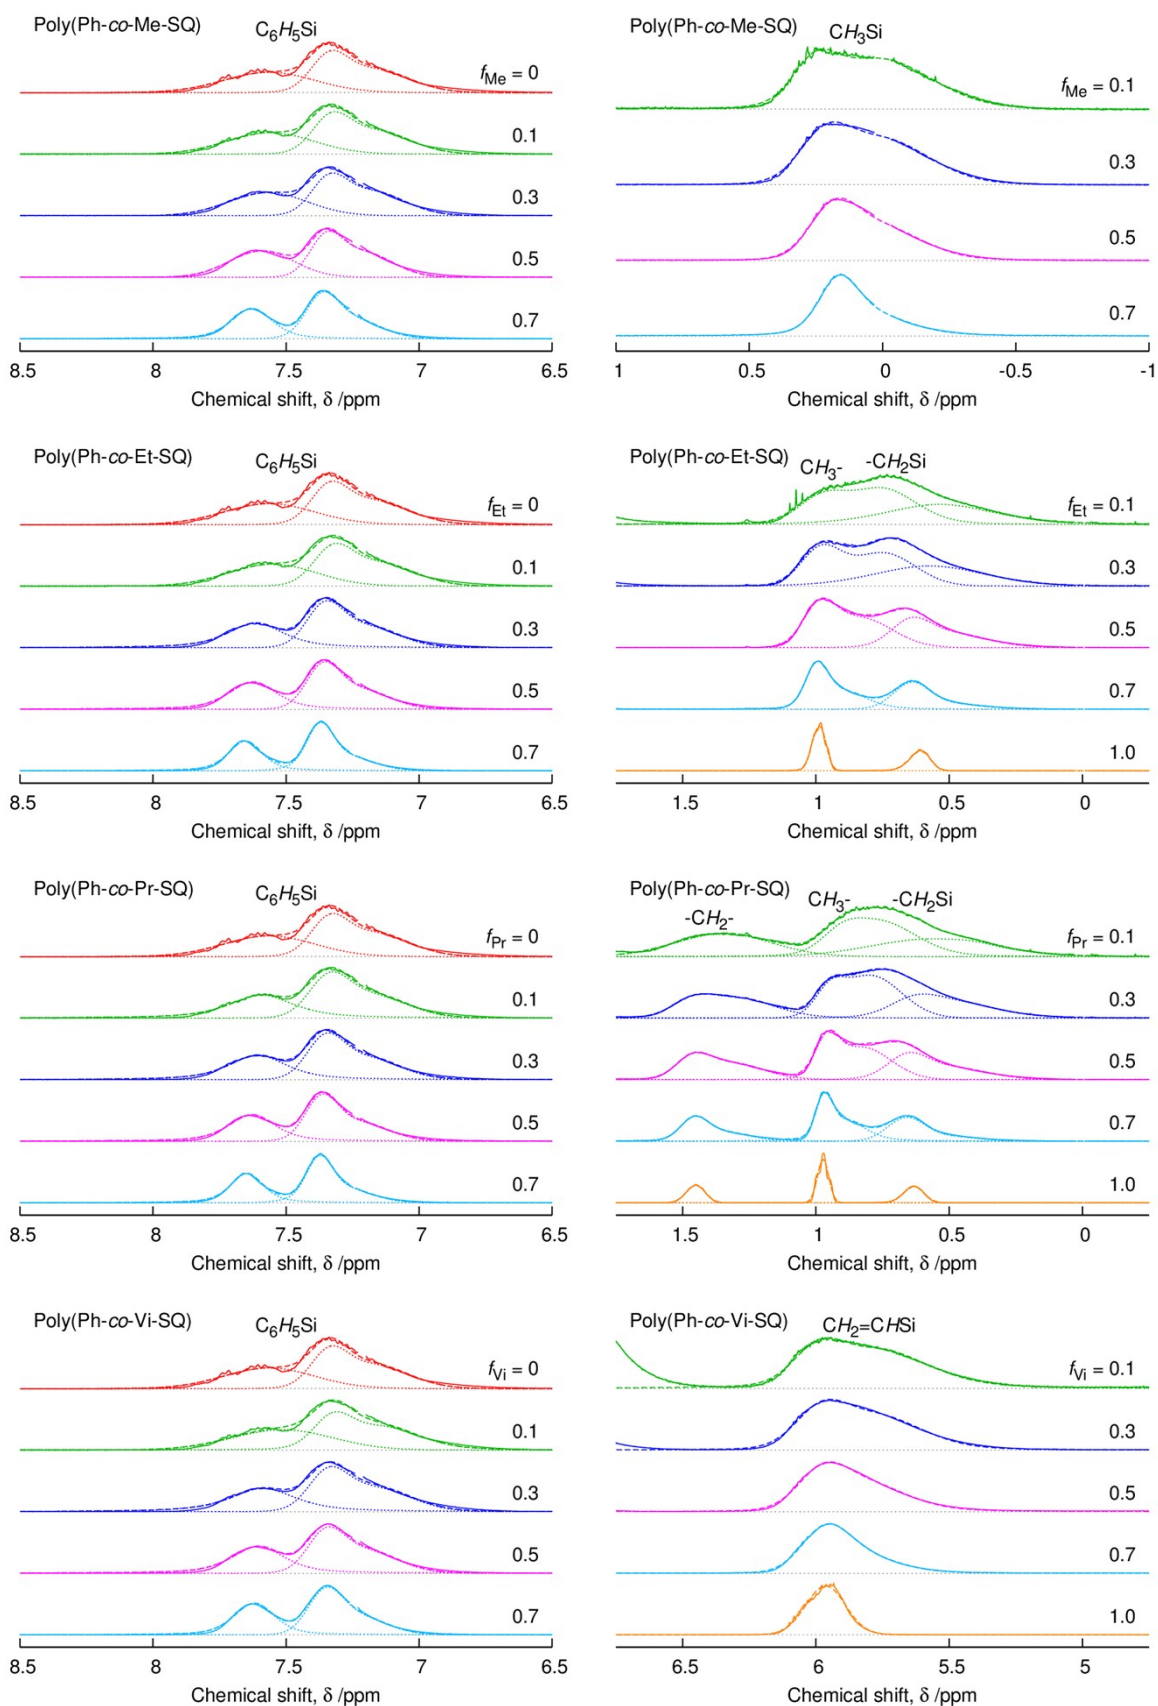

**Fig. S2** Results of least-squares fitting of  $^1\text{H}$  NMR spectra shown in Figs. 3 and S1. Solid and dashed lines denote observed and simulated spectra, respectively, and dotted lines indicate spectra of decomposed peaks. Each peak was expressed by one or two pseudo-Voigt functions, and its intensity (area) was assumed to be proportional to the number of  $^1\text{H}$  nuclei attributed to the peak.

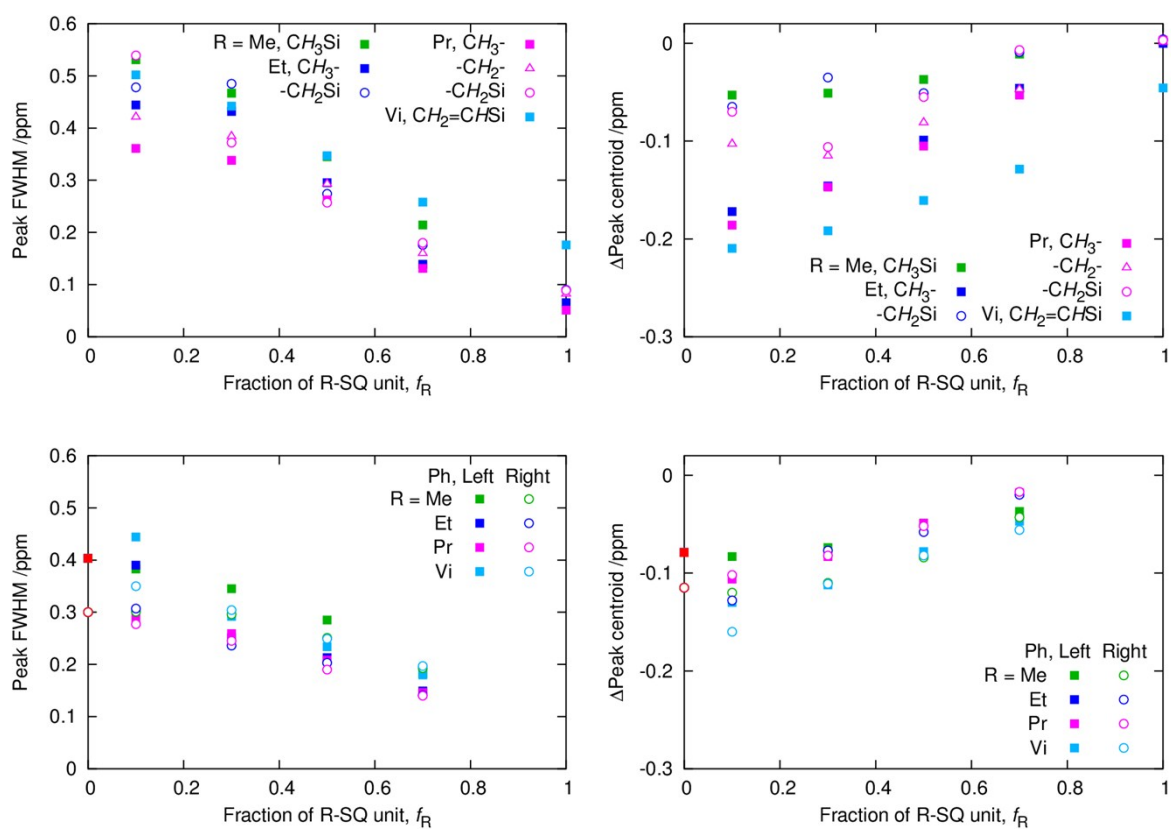

**Fig. S3** Full-width at half-maximum (FWHM) and centroid of peaks for alkyl and vinyl groups (top) and phenyl groups (bottom), evaluated by the peak fitting and decomposition of <sup>1</sup>H NMR spectra shown in Fig. S2. Centroid is plotted as the shift from the peak position of corresponding trimethoxide (monomer).

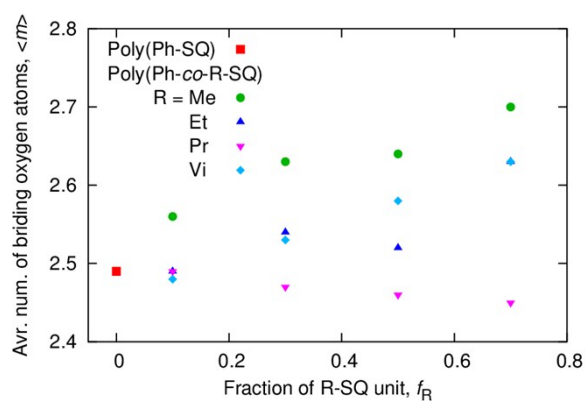

**Fig. S4** Variation of average number of bridging oxygen atoms,  $\langle m \rangle$ , with the fraction of R-SQ units,  $f_R$ , in poly(Ph-co-R-SQ).
